# Supplementary material for: CD30 is a survival factor and a biomarker for transformed human pluripotent stem cells
Source: Springer Nature journal article supplement (doi:10.1038/nbt1197), 2006-02-26
Supplement: nbt1197-S3.pdf [file nbt1197-S3.pdf]

HES-3 Diploid  
+FGF-2  
GCTM-2<sup>+</sup> 72%

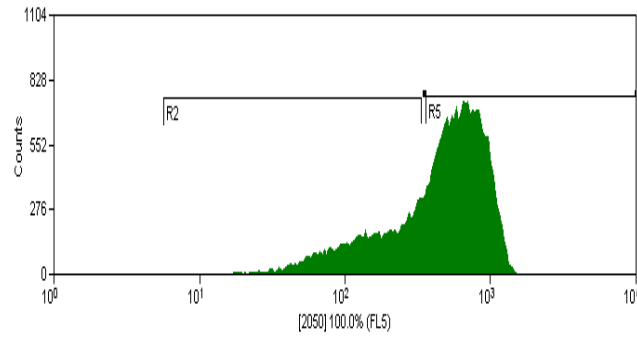

HES-3 Diploid  
-FGF-2  
GCTM-2<sup>+</sup> 40%

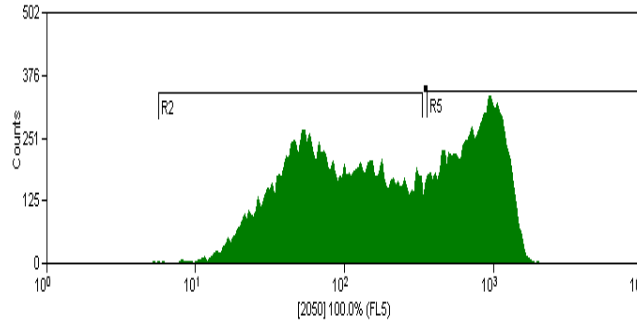

HES-3 Trisomy 12  
+FGF  
GCTM-2<sup>+</sup> 75%

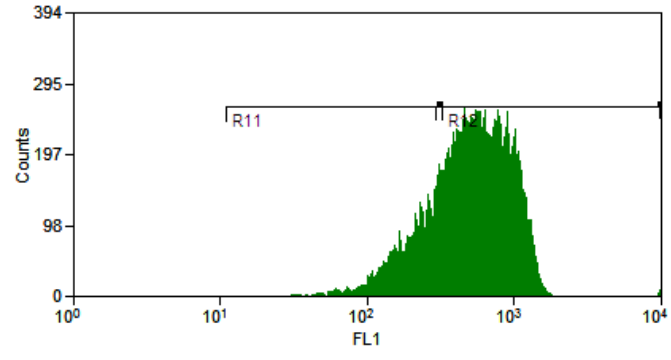

HES-3 Trisomy 12  
-FGF  
GCTM-2<sup>+</sup> 77%

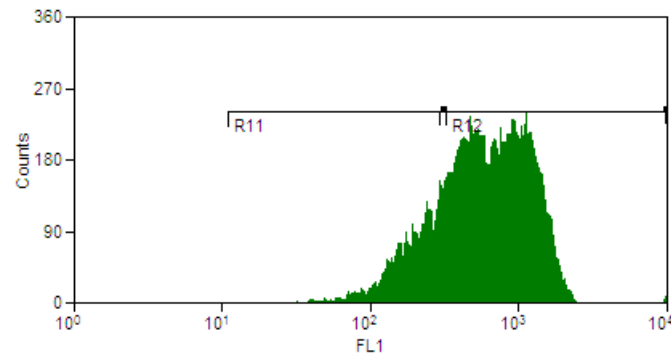

Supplementary Figure 3. Differentiation of diploid or karyotypically abnormal hESC in vitro. Flow cytometric analysis of the effect of FGF-2 withdrawal on the expression of GCTM-2 stem cell marker in diploid HES-3 cells P30+21 or HES-3 cells bearing trisomy 12 P86+17. Cells were cultured in serum replacement medium in the presence of a feeder layer with or without FGF-2 for 15 days, then analysed. Percentage of GCTM-2<sup>+</sup> cells relative to irrelevant isotype control is indicated.
