# Supplementary material for: CD30 is a survival factor and a biomarker for transformed human pluripotent stem cells
Source: Springer Nature journal article supplement (doi:10.1038/nbt1197), 2006-02-26
Supplement: nbt1197-S6.pdf [file nbt1197-S6.pdf]

Supplementary Table 1. Karyotype analysis of ES cell lines grown under different conditions.

| CELL LINE   | DATE  | KARYOTYPE                  | CULTURE TYPE <sup>1</sup> |
|-------------|-------|----------------------------|---------------------------|
| HES1P44     | 11/04 | 46XX                       | STANDARD                  |
| HES2P39     | 3/01  | 46XX                       |                           |
| HES2P89     | 4/04  | 46XX                       |                           |
| HES2P118    | 9/02  | 46XX                       |                           |
| HES3P8      | 4/01  | 46XX                       |                           |
| HES3P19     | 3/02  | 46XX                       |                           |
| HES3P21     | 4/03  | 46XX                       |                           |
| HES3P69     | 2/04  | 46XX                       |                           |
| HES3EGFPP61 | 12/03 | 46XX                       |                           |
| HES4P22     | 3/01  | 46XY                       |                           |
| HES4P56     | 2/04  | 46XY                       |                           |
| HES4P99     | 9/02  | 46XY                       |                           |
| HES5P13     | 12/01 | 46XY                       |                           |
| HES6P19     | 2/02  | 46XX                       |                           |
|             |       |                            |                           |
| HES2P51+28  | 1/04  | 46XX<br>dup(1)(q21.1q32.1) | SR/MEF                    |
| HES2P57+22  | 12/03 | 46XX<br>dup(1)(q21.1q32.1) | SR/MG                     |
| HES3P51+22  | 12/03 | 46XX                       | SR/MEF                    |
| HES3P55+10  | 1/04  | MOSAIC 46XX;<br>47XX+12    | SR/MEF                    |
| HES3 P37+32 | 5/05  | 46XX,<br>t(1;6)(p22;q15)   | SR/MEF                    |
| HES3P85+11  | 4/03  | 46XX                       | SR/MEF                    |
| HES4P32+11  | 1/04  | 46XY                       | SR/MEF                    |
| HES4P32+13  | 12/03 | 46XY                       | SR/MEF                    |
| HES4P41+11  | 1/04  | 46XY                       | SR/MEF                    |
| HES4P41+28  | 4/04  | 46XY                       | SR/MEF                    |
| HES4P57+18  | 5/05  | 46XY                       | SR/MEF                    |

<sup>1</sup>Standard culture conditions are growth in serum-containing medium in the presence of a mouse embryo fibroblast feeder cell layer with transfer by mechanical dissection of ES colonies. SR/MEF refers to culture in medium supplemented with Knockout Serum Replacer plus FGF-2 in the presence of a mouse embryo fibroblast feeder cell layer, with transfer using enzymatic harvest or cell dissociation buffer. SR/MG refers to a culture system using Knockout Serum Replacer plus FGF-2 and mouse embryo fibroblast conditioned medium and a Matrigel coated substrate; transfer is similar to SR/MEF.
